# Supplementary material
Source: publisher figshare collection journal article supplement (https://asha.figshare.com/articles/dataset/_/6002267)
Supplement: Supplementary file 1 [file 1]

## Supplemental Material S2. Details of transmitted information computation.

The percentage of transmitted information ( $I$ ) was calculated using entropy with the same method as Robert-Ribes, Schwartz, Lallouache, and Escudier (1998):

$$I = 100 \frac{H(s, r)}{H(s)}$$

where  $H(s, r)$  is the information shared between stimulus ( $s$ ) and response ( $r$ ) and  $H(s)$  is the information in the stimulus, with:

$$H(s, r) = - \sum_i \sum_j p(s_i, r_j) \log_2 \left( \frac{p(s_i)p(r_j)}{p(s_i, r_j)} \right)$$

$$H(s) = - \sum_i p(s_i) \log_2(p(s_i))$$

where:

- $p(s_i)$  is the probability of occurrence of feature  $s_i$  in the stimulus;
- $p(r_j)$  the probability of occurrence of feature  $r_j$  in the response;
- $p(s_i, r_j)$  is the joint probability of occurrence of feature  $s_i$  in the stimulus and feature  $r_j$  in the response.

These probabilities are estimated using the concatenated confusion matrices ( $M_c$ ) in which consonants with the same feature are grouped together (i.e., resulting  $2 \times 2$  matrix for voicing,  $3 \times 3$  matrix for place of articulation, and  $4 \times 4$  matrix for mode of articulation) as:

$$p(s_i) = n_i/n ; p(r_j) = n_j/n ; p(s_i, r_j) = n_{ij}/n$$

where:

- $n_i$  is the number of stimuli with feature  $s_i$ ;
- $n_j$  is the number of responses with feature  $r_j$ ;
- $n_{ij}$  is the number of items with feature  $s_i$  in the stimulus and feature  $r_j$  in the response;
- $n$  is the total number of stimuli.

## Reference

Robert-Ribes, J., Schwartz, J. L., Lallouache, T., & Escudier, P. (1998). Complementarity and synergy in bimodal speech: Auditory, visual, and audio–visual identification of French oral vowels in noise. *The Journal of the Acoustical Society of America*, 103(6), 3677–3689. <https://doi.org/10.1121/1.423069>
