# Supplementary material
Source: publisher figshare collection journal article supplement (https://asha.figshare.com/articles/dataset/_/6002267)
Supplement: Supplementary file 2 [file 1]

**Supplemental Material S4.** Analysis of the probability of correct consonant identification as a function of experimental condition. AV = auditory–visual; A = auditory; V = visual; DS = Down syndrome; Ctr = control.

|                                                       |        | VOICED |        |        |            |        |        |      |        | UNVOICED   |        |        |        |        |            |        |        |        |        |
|-------------------------------------------------------|--------|--------|--------|--------|------------|--------|--------|------|--------|------------|--------|--------|--------|--------|------------|--------|--------|--------|--------|
|                                                       |        | AV     |        | A      |            | V      |        |      |        | AV         |        | A      |        | V      |            |        |        |        |        |
| LABIALS                                               |        |        |        |        |            |        |        |      |        |            |        |        |        |        |            |        |        |        |        |
| Plosive                                               | Ctr    | 0.78   | (0.10) | >      | 0.38       | (0.10) | ~      | 0.48 | (0.11) | 0.95       | (0.05) | >      | 0.45   | (0.10) | ~          | 0.55   | (0.12) |        |        |
|                                                       | DS     | b      | 0.69   | (0.10) | >          | 0.34   | (0.11) | ~    | 0.47   | (0.12)     | p      | 0.83   | (0.09) | >      | 0.42       | (0.12) | ~      | 0.49   | (0.13) |
|                                                       | Ctr-DS |        | 0.09   |        | 0.03       |        | 0.01   |      |        | 0.11       |        | 0.03   |        | 0.06   |            |        |        |        |        |
| Nasal                                                 | Ctr    | 0.29   | (0.09) | ~      | 0.10       | (0.06) | ~      | 0.14 | (0.09) |            |        |        |        |        |            |        |        |        |        |
|                                                       | DS     | m      | 0.25   | (0.10) | >          | 0.03   | (0.04) | ~    | 0.05   | (0.04)     |        |        |        |        |            |        |        |        |        |
|                                                       | Ctr-DS |        | 0.04   |        | 0.07       |        | 0.08   |      |        |            |        |        |        |        |            |        |        |        |        |
| Fricative                                             | Ctr    | 0.76   | (0.08) | ~      | 0.54       | (0.12) | ~      | 0.33 | (0.11) | f          | 0.67   | (0.12) | ~      | 0.52   | (0.13)     | ~      | 0.49   | (0.12) |        |
|                                                       | DS     | v      | 0.80   | (0.08) | >          | 0.24   | (0.08) | ~    | 0.29   | (0.12)     |        | 0.83   | (0.08) | ~      | 0.35       | (0.09) | ~      | 0.53   | (0.12) |
|                                                       | Ctr-DS |        | -0.04  |        | 0.30       |        | 0.04   |      |        | -0.17      |        | 0.17   |        | -0.04  |            |        |        |        |        |
| CORONALS                                              |        |        |        |        |            |        |        |      |        |            |        |        |        |        |            |        |        |        |        |
| Plosive                                               | Ctr    | 0.50   | (0.12) | ~      | 0.41       | (0.11) | ~      | 0.19 | (0.09) | t          | 0.81   | (0.08) | ~      | 0.76   | (0.09)     | >      | 0.26   | (0.10) |        |
|                                                       | DS     | d      | 0.11   | (0.07) | ~          | 0.08   | (0.06) | ~    | 0.19   | (0.09)     |        | 0.80   | (0.09) | ~      | 0.63       | (0.10) | >      | 0.28   | (0.11) |
|                                                       | Ctr-DS |        | 0.39   |        | 0.32       |        | 0      |      |        | 0.01       |        | 0.14   |        | -0.02  |            |        |        |        |        |
| Nasal                                                 | Ctr    | 0.35   | (0.09) | ~      | 0.23       | (0.09) | ~      | 0.05 | (0.06) |            |        |        |        |        |            |        |        |        |        |
|                                                       | DS     | n      | 0.35   | (0.13) | ~          | 0.29   | (0.12) | >    | 0.04   | (0.04)     |        |        |        |        |            |        |        |        |        |
|                                                       | Ctr-DS |        | 0      |        | -0.06      |        | 0.01   |      |        |            |        |        |        |        |            |        |        |        |        |
| Fricative                                             | Ctr    | 0.86   | (0.10) | ~      | 0.76       | (0.09) | >      | 0.13 | (0.08) | s          | 0.86   | (0.08) | ~      | 0.75   | (0.11)     | >      | 0.38   | (0.12) |        |
|                                                       | DS     | z      | 0.59   | (0.10) | ~          | 0.50   | (0.09) | >    | 0.04   | (0.04)     |        | 0.68   | (0.10) | ~      | 0.44       | (0.1)  | ~      | 0.20   | (0.09) |
|                                                       | Ctr-DS |        | 0.30   |        | 0.26       |        | 0.08   |      |        | 0.19       |        | 0.31   |        | 0.18   |            |        |        |        |        |
|                                                       | Ctr    | 0.76   | (0.1)  | >      | 0.32       | (0.10) | ~      | 0.31 | (0.11) |            | 0.84   | (0.07) | ~      | 0.85   | (0.07)     | >      | 0.40   | (0.12) |        |
|                                                       | DS     | ʒ      | 0.45   | (0.15) | ~          | 0.22   | (0.10) | ~    | 0.18   | (0.10)     | j      | 0.65   | (0.08) | ~      | 0.47       | (0.06) | ~      | 0.44   | (0.09) |
|                                                       | Ctr-DS |        | 0.31   |        | 0.10       |        | 0.14   |      |        | 0.20       |        | 0.39   |        | -0.04  |            |        |        |        |        |
| Other                                                 | Ctr    | 0.84   | (0.08) | ~      | 0.63       | (0.10) | ~      | 0.32 | (0.11) |            |        |        |        |        |            |        |        |        |        |
|                                                       | DS     | l      | 0.44   | (0.12) | ~          | 0.26   | (0.09) | ~    | 0.22   | (0.08)     |        |        |        |        |            |        |        |        |        |
|                                                       | Ctr-DS |        | 0.41   |        | 0.36       |        | 0.10   |      |        |            |        |        |        |        |            |        |        |        |        |
| DORSALS                                               |        |        |        |        |            |        |        |      |        |            |        |        |        |        |            |        |        |        |        |
| Plosive                                               | Ctr    | 0.82   | (0.08) | >      | 0.77       | (0.09) | >      | 0.15 | (0.07) | k          | 0.90   | (0.07) | >      | 0.88   | (0.08)     | >      | 0.11   | (0.07) |        |
|                                                       | DS     | g      | 0.64   | (0.10) | ~          | 0.34   | (0.08) | ~    | 0.25   | (0.11)     |        | 0.76   | (0.07) | >      | 0.64       | (0.08) | >      | 0.17   | (0.08) |
|                                                       | Ctr-DS |        | 0.19   |        | 0.43       |        | -0.10  |      |        | 0.14       |        | 0.24   |        | -0.05  |            |        |        |        |        |
| Other                                                 | Ctr    | 0.8    | (0.11) | ~      | 0.55       | (0.13) | ~      | 0.26 | (0.09) |            |        |        |        |        |            |        |        |        |        |
|                                                       | DS     | ʁ      | 0.75   | (0.11) | >          | 0.44   | (0.11) | ~    | 0.19   | (0.09)     |        |        |        |        |            |        |        |        |        |
|                                                       | Ctr-DS |        | 0.05   |        | 0.11       |        | 0.07   |      |        |            |        |        |        |        |            |        |        |        |        |
| > greater than with <i>p</i> < .05; ~ nonsignificant. |        |        |        |        |            |        |        |      |        |            |        |        |        |        |            |        |        |        |        |
| AV ~ A ~ V                                            |        |        |        |        | AV ~ A > V |        |        |      |        | AV > A ~ V |        |        |        |        | AV > A > V |        |        |        |        |

Average values and 95% confident intervals between-participants are provided. Background colors highlight significant differences between modalities and bold numbers significant differences between groups ( $p < .05$ ). The regression analysis and multiple comparisons were run using the same method as in Analysis 1 (see Methods section in main article). The full model *Modality\*Speaker\_group\*Stimulus + (Modality\*Speaker\_group | Participant) + (Modality\*Speaker\_group | Speaker)* was used to perform all multiple comparisons. The area under the receiver operating characteristic (ROC) curve computed from the full model (logistic regression) is 0.82 (good predictive level).
