# Supplementary material
Source: publisher figshare collection journal article supplement (https://asha.figshare.com/articles/dataset/_/6002267)
Supplement: Supplementary file 3 [file 1]

### Supplemental Material S3. Effect of presentation order on Prob\_correct\_VCV.

The effect of *Modality* is slightly sensitive to presentation order but in a similar way for both speaker groups (Figure S3-1). In *AV*, *Prob\_correct\_VCV* does not significantly depend on *Pres\_order*. In *A*, there are slightly more correct responses for the *AV/A/V* order than for the *A/AV/V*, *A/V/AV*, *V/A/AV* ( $p < .01$ ), and *V/AV/A* orders ( $p < .05$ ), as well as for the *AV/V/A* order than for the *A/AV/V*, *A/V/AV*, and *V/A/AV* orders ( $p < .01$ ). In *V*, performances tend to be better when *AV* is presented before *V* (*A/AV/V*; *AV/A/V*; *AV/V/A*) rather than after (*A/V/AV*, *V/A/AV*, *V/AV/A*), differences being significant in all cases ( $p < .04$ ) except *A/AV/V* versus *A/V/AV* ( $p = .40$ ) and *AV/V/A* versus *A/V/AV* ( $p = .37$ ).

Figure 3S-1.

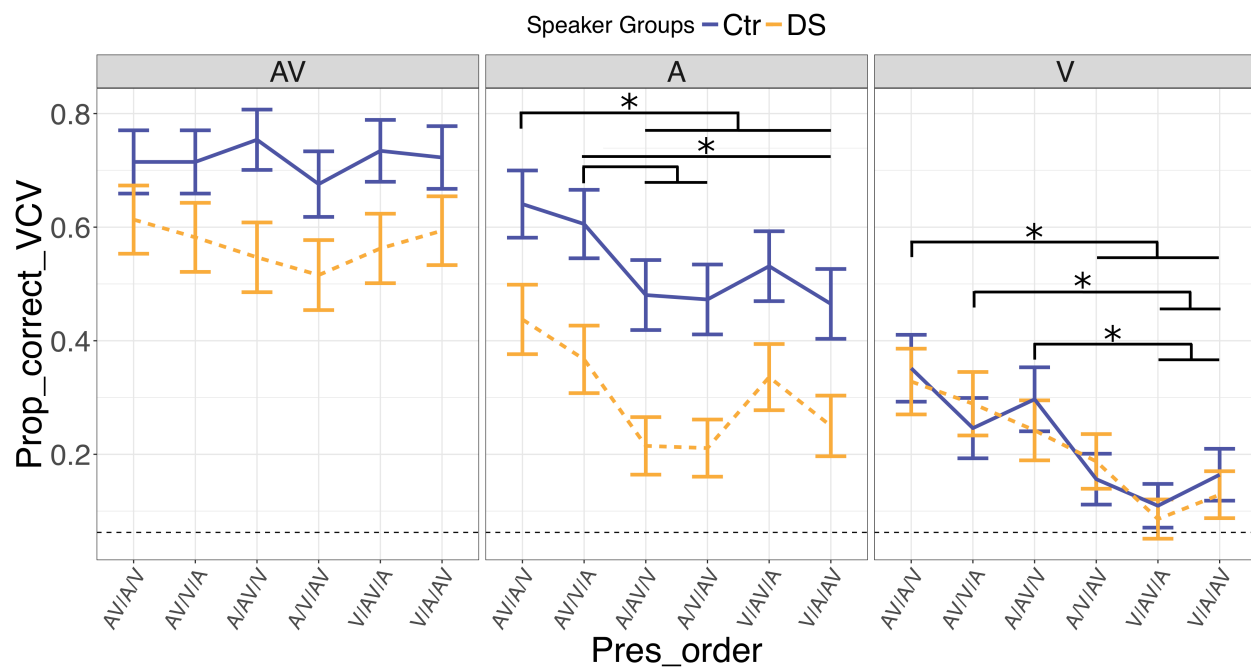

Probability of correct vowel-consonant-vowel (VCV) responses (Prob\_correct\_VCV) averaged across participants for each Modality as a function of Speaker\_group and presentation order (Pres\_order). Error bars are between-subject 95% confidence intervals. Horizontal lines and asterisks highlight significant differences between conditions ( $p < .05$ ).
