# Supplementary material
Source: publisher figshare collection journal article supplement (https://asha.figshare.com/articles/dataset/_/6002267)
Supplement: Supplementary file 4 [file 1]

**Supplemental Material S1.** General information about intelligibility and orofacial specificities of the four speakers with Down syndrome (DS).  
VCV = vowel–consonant–vowel.

|                                                                                                                  | DS1                                        | DS2                             | DS3                             | DS4                             |
|------------------------------------------------------------------------------------------------------------------|--------------------------------------------|---------------------------------|---------------------------------|---------------------------------|
| <b>Age/gender</b>                                                                                                | 19, female                                 | 21, male                        | 24, female                      | 30, male                        |
| <b>Acoustic evaluation of VCVs by expert phoneticians<sup>1</sup></b>                                            |                                            |                                 |                                 |                                 |
| <b>Percentage of correct identifications</b>                                                                     | 96%                                        | 85%                             | 56%                             | 78%                             |
| <b>Self-evaluation of speech intelligibility (interview of the person with DS by the experimenter)</b>           |                                            |                                 |                                 |                                 |
| <b>How do people understand you?<sup>2</sup></b><br>1 ( <i>really bad</i> ) to 4 ( <i>perfect</i> ) imaged scale | Not available                              | 4/4 (family)<br>1/4 (strangers) | 2/4 (family)<br>1/4 (strangers) | 3/4 (family)<br>1/4 (strangers) |
| <b>Evaluation by parents (extracted from parental survey)</b>                                                    |                                            |                                 |                                 |                                 |
| <b>Dental anomalies</b>                                                                                          | Alignment, super-numerary                  | Alignment, narrow palate        | Alignment, super-numerary       | Alignment                       |
| <b>Orofacial Surgery</b>                                                                                         | Amygdales                                  | None                            | None                            | Amygdales                       |
| <b>Quality of speech communication</b><br>1 ( <i>really bad</i> ) to 4 ( <i>perfect</i> )                        | 4/4 (family)<br>2/4 (strangers)            | 4/4 (family)<br>3/4 (strangers) | 2/4 (family)<br>1/4 (strangers) | 3/4 (family)<br>3/4 (strangers) |
| <b>Issues with consonants</b>                                                                                    | Sometimes                                  | Often                           | Very often                      | Very often                      |
| <b>Issues with vowels</b>                                                                                        | Sometimes                                  | Sometimes                       | Very often                      | Sometimes                       |
| <b>Evaluations of bucco-facial praxies by the experimenters/students in speech pathology<sup>3</sup></b>         |                                            |                                 |                                 |                                 |
| <b>Tongue</b>                                                                                                    | Protrusion                                 | +                               | +                               | ±                               |
|                                                                                                                  | Reach lip corners/palate scan              | +                               | +                               | –                               |
|                                                                                                                  | Upward to the nose                         | ±                               | –                               | –                               |
|                                                                                                                  | Backwards to the chin/claps                | +                               | +                               | +                               |
|                                                                                                                  | Tooth scan                                 | +                               | +                               | ±                               |
|                                                                                                                  | Clicks (tongue tip)                        | ±                               | –                               | ±                               |
|                                                                                                                  | Tongue back to produce [krrr]              | ±                               | ±                               | ±                               |
| <b>Lips</b>                                                                                                      | Pursed                                     | +                               | +                               | –                               |
|                                                                                                                  | Smile stretch                              | +                               | +                               | +                               |
|                                                                                                                  | Upper lip covered by lower lip             | +                               | +                               | –                               |
|                                                                                                                  | Kiss                                       | ±                               | +                               | ±                               |
|                                                                                                                  | Vibration                                  | ±                               | +                               | –                               |
|                                                                                                                  | Tonicity (/p/ sound)                       | +                               | +                               | ±                               |
| <b>Cheeks</b>                                                                                                    | Both side puff with and without resistance | +                               | +                               | –                               |
|                                                                                                                  | Left–right alternate puff                  | –                               | –                               | –                               |
| <b>Jaw</b>                                                                                                       | Maximal opening                            | +                               | +                               | +                               |
|                                                                                                                  | Clench                                     | +                               | undo                            | +                               |
|                                                                                                                  | Bits opposite lip                          | +                               | +                               | ±                               |
| <b>Breath</b>                                                                                                    | Blow in a straw                            | +                               | +                               | ±                               |

<sup>1</sup>Nine expert phoneticians transcribed VCVs produced by speakers with DS based on the acoustic recording only. The percentage of correct identifications was averaged over the nine experts to get an idea of the auditory intelligibility of the speakers.

<sup>2</sup>Questions were orally asked to the person and she answered by selecting an item on a visual four-step scale: very happy green smiley (score: 4), happy yellow smiley (score: 3), unhappy orange smiley (score: 2), or very unhappy red smiley (score: 1).

<sup>3</sup>The praxies were scored on a three-step scale with movement impossible to make (–), movement poorly realized (±), or movement well realized (+). Items with the same scores are grouped for space reasons.
